# Supplementary material
Source: PubMed Central journal article supplement (PMC5889648)
Supplement: pnas.201719245SI.pdf [file pnas.201719245SI.pdf]

# Supporting Information

Voogdt et al. 10.1073/pnas.1719245115

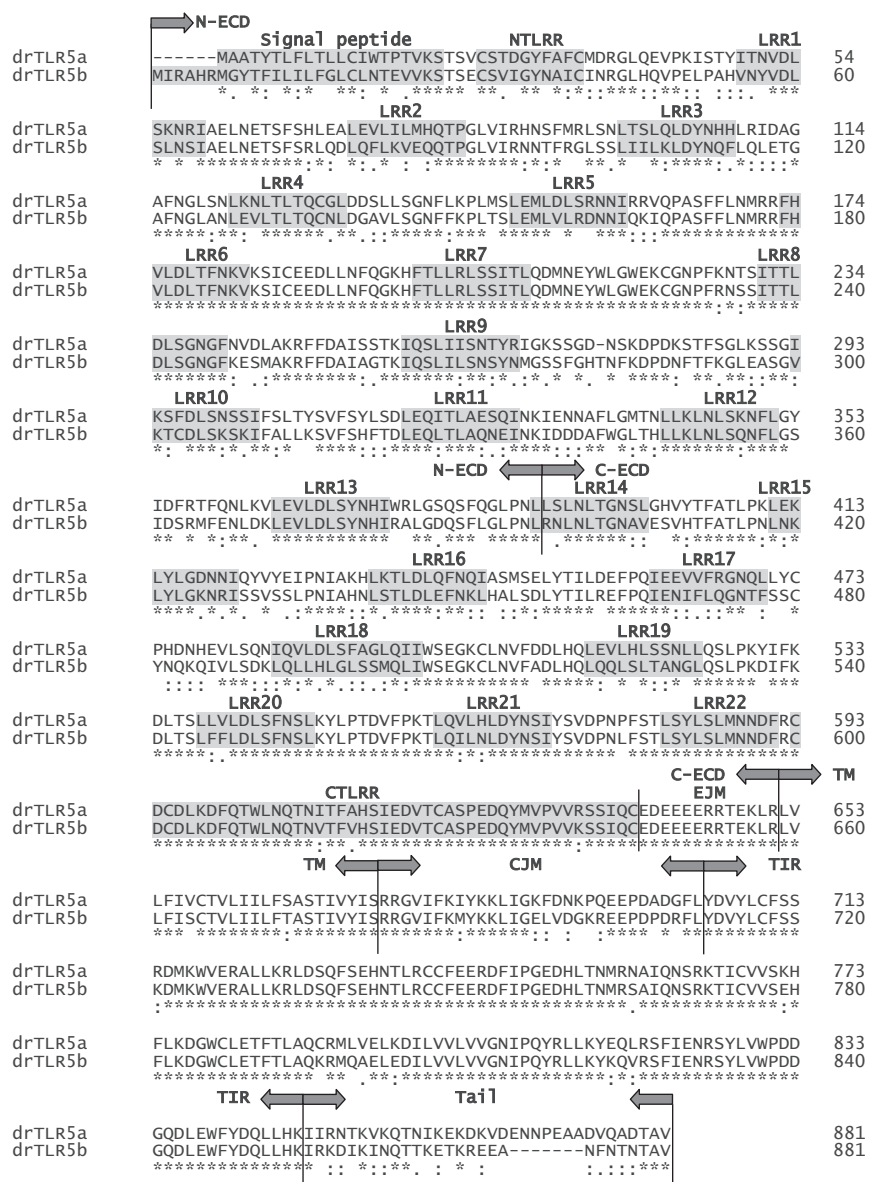

**Fig. S1.** Alignment of zebrafish drTLR5a and drTLR5b. The amino acid sequences were aligned using the Clustal Omega server with default settings. Asterisks (\*) indicate identical residues, double square dots (:) indicate highly similar residues, single square dots (.) indicate somewhat similar residues, and bars (-) indicate gaps to complete the sequence alignment. Signal peptide, NTLRR, 22 consecutive LRRs, and CTLRR are shaded in gray. Gray arrows indicate the start and end of specified regions.

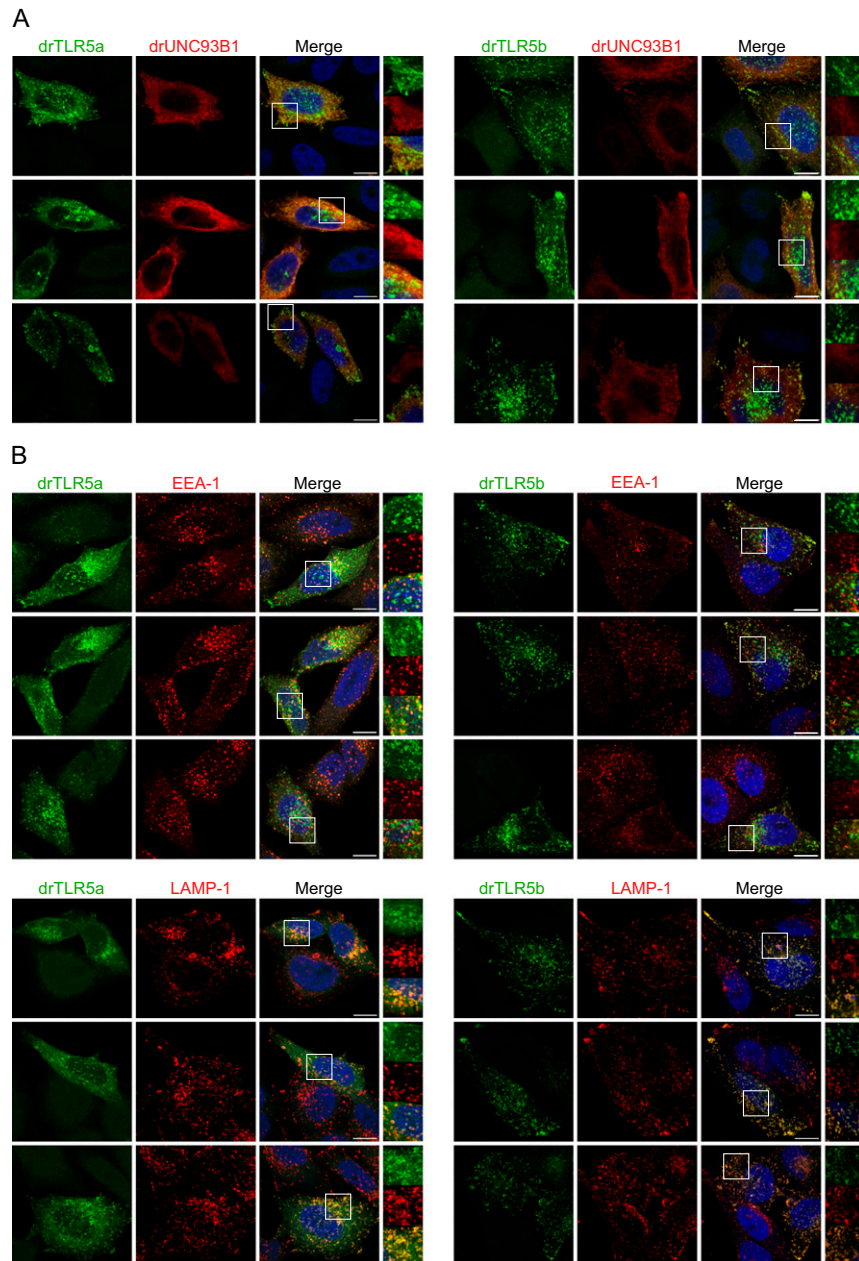

**Fig. S2.** Vesicular localization of drTLR5a and drTLR5b in the presence of drUNC93B1. Confocal microscopy on HeLa-57A cells expressing (A) drTLR5a-HA or drTLR5b-HA and drUNC93B1-FLAG or (B) drTLR5a-HA or drTLR5b-HA and untagged drUNC93B1 costained for EEA-1 or LAMP-1. Merge images show nuclei stained with DAPI (blue). White boxes in merge images indicate the magnified area shown for each channel on the right of merge images. Images were selected from three independent experiments, and three representative images are shown for each transfected group. (Scale bars in merge images: 10  $\mu$ m.)





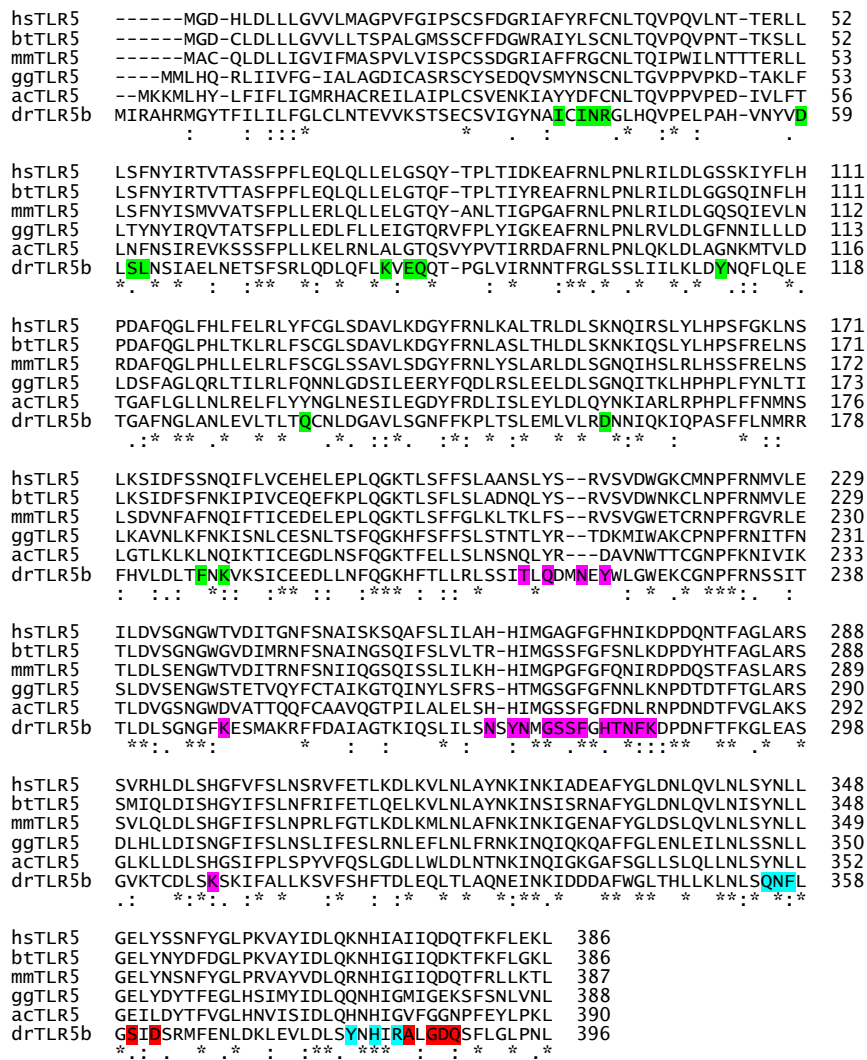

**Fig. S6.** Sequence alignment of the TLR5 N-ECD of different vertebrates. Alignment of the TLR5 N-ECD of *Homo sapiens* (human; NCBI reference sequence: AAI09119.1), *Bos taurus* (bovine; ABC68311.1), *Mus musculus* (mouse; AAI25248.1), *Gallus gallus* (chicken; ACR26275.1), *Anolis carolinensis* (green anole lizard; ALT10445.1), and zebrafish. Alignment was constructed with the Clustal Omega server with default settings. Asterisks (\*) indicate identical residues, double square dots (:) indicate highly similar residues, single square dots (.) indicate somewhat similar residues, and bars (-) indicate gaps to complete the sequence alignment. Residues in the drTLR5b crystal model responsible for flagellin binding and dimerization are color-coded according to Yoon et al. (19): green, primary interface-A; purple, primary interface-B; cyan, dimerization interface-β; red, dimerization interface-α. Green and purple residues interact with flagellin, red residues interact with the second flagellin molecule in the 2:2 stoichiometric homodimeric TLR5-flagellin crystal model, cyan residues interact with the second drTLR5b molecule [see also Yoon et al. (19)]. ac, *Anolis carolinensis*; bt, *Bos taurus*; gg, *Gallus gallus*; hs, *Homo sapiens*; mm, *mus musculus*.



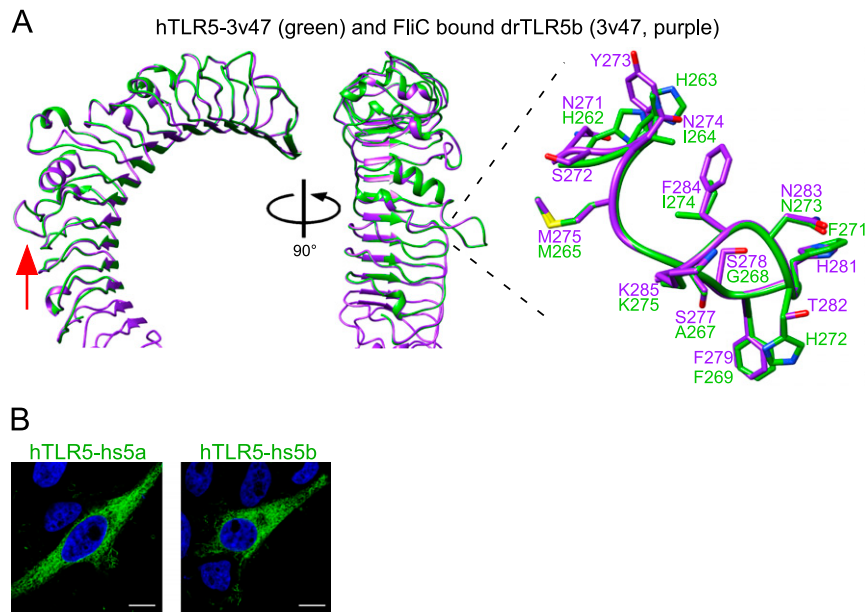

**Fig. S7.** (A) Structural modeling of human TLR5 onto drTLR5b. Superposition of FliC-bound drTLR5b (PDB ID: 3v47; purple) and a model of hTLR5 based on 3v47 (hTLR5-3v47; green). The red arrow indicates the flagellin-binding hotspot that forms a loop between LRR9 and LRR10. (B) Expression of hTLR5 chimeric constructs. HeLa-57A cells were transfected with FLAG-tagged hTLR5-hs5a or hTLR5-hs5b and stained with  $\alpha$ -FLAG (green) and DAPI (blue) for nuclear visualization. Images are representative of two independent experiments. (Scale bars: 10  $\mu$ m.)

**Table S1. Primers used in this study**

| Product                                      | Primer  | Sequence (5'-3')                        |
|----------------------------------------------|---------|-----------------------------------------|
| <b>Bam</b> HI-Kozak-drTLR5b-NotI             | CV039 F | CCGGATCCGCCACCATGATCCGTGCTCACAGAATGG    |
|                                              | CV054 R | CCGCGGCCGCTTACTGCTGTGTGGTGTGAAATG       |
| <b>Bam</b> HI-Kozak-drTLR5a-NotI             | CV095 F | CCGGATCCGCCACCATGGCAGCTACATACACTTTATTTC |
|                                              | CV096 R | CCGCGGCCGCTAACTGCAGTGTCTGCTTGAAC        |
| <b>Kpn</b> I-Kozak-drUNC93B1-NotI            | CV159 F | CCGGTACCGCCACCATGGCAGCACTGATCGC         |
|                                              | CV160 R | CCGCGGCCGCAAGTGTGGACGTAGTCATCTC         |
| <b>Kpn</b> I-Kozak-drUNC93B1-NotI-stop codon | CV159 F | CCGGTACCGCCACCATGGCAGCACTGATCGC         |
|                                              | CV180 R | CCGCGGCCGCTTAGTGTGGACGTAGTCATCTC        |
| <b>Bam</b> HI-Kozak-hTLR5-NotI               | CV257 F | CCGGATCCGCCACCATGGGAGA                  |
|                                              | CV259 R | CCGCGGCCGCTGGAGATGGTTGCTACAGTTTG        |

Restriction enzyme sequences are in bold; the Kozak sequences in forward primers are underlined.
